# Supplementary material for: Proteomic and Metabolic Analysis of Pinus halepensis Mill. Embryonal Masses Induced under Heat Stress
Source: MDPI journal article supplement (doi:10.3390/ijms24087211), 2023-04-13
Supplement: s1 [file s1]

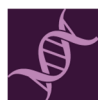

## Supplementary Material

**Table S1.** Proteins differentially accumulated in *Pinus halepensis* EMs induced under different temperatures treatments, according to the Kruskal-Wallis test ( $p < 0.05$ ) and Dunn's test of multiple comparisons (Benjamini-Hochberg  $p$ -value adjustment): Cond1 = 23 °C; Cond2: 40 °C (4 h); Cond3: 50 °C (30 min); Cond4: 60 °C (5 min).

| Protein                                                                                                                   | Uniprot Accession | Species                                    | Dunn's Test of Multiple Comparisons |             |             | Kruskal-Wallis |
|---------------------------------------------------------------------------------------------------------------------------|-------------------|--------------------------------------------|-------------------------------------|-------------|-------------|----------------|
|                                                                                                                           |                   |                                            | Cond2/Cond1                         | Cond3/Cond1 | Cond4/Cond1 | $p$ - value    |
| Citrate synthase, mitochondrial                                                                                           | O80433            | <i>Daucus carota</i>                       | 0.350                               | 0.056       | 0.003       | 0.004          |
| Aconitate hydratase, cytoplasmic                                                                                          | P49608            | <i>Cucurbita maxima</i>                    | 0.017                               | 0.002       | 0.081       | 0.006          |
| NADP-dependent malic enzyme 3                                                                                             | Q9XGZ0            | <i>Arabidopsis thaliana</i>                | 0.069                               | 0.478       | 0.056       | 0.006          |
| Trifunctional UDP-glucose 4,6-dehydratase/UDP-4-keto-6-deoxy-D-glucose 3,5-epimerase/UDP-4-keto-L-rhamnose-reductase RHM1 | Q9SYM5            | <i>Arabidopsis thaliana</i>                | 0.275                               | 0.061       | 0.021       | 0.009          |
| Agglutinin                                                                                                                | P06750            | <i>Ricinus communis</i>                    | 0.026                               | 0.018       | 0.006       | 0.011          |
| Protein kinase G11A                                                                                                       | Q0DCT8            | <i>Oryza sativa</i> subsp. <i>japonica</i> | 0.080                               | 0.017       | 0.007       | 0.014          |
| Polyadenylate-binding protein RBP47                                                                                       | Q9LEB3            | <i>Nicotiana glauca</i>                    | 0.009                               | 0.015       | 0.056       | 0.015          |
| Molybdenum cofactor sulfurase                                                                                             | Q8LGM7            | <i>Solanum lycopersicum</i>                | 0.116                               | 0.010       | 0.014       | 0.016          |
| Actin-depolymerizing factor 10                                                                                            | Q9LQ81            | <i>Arabidopsis thaliana</i>                | 0.188                               | 0.017       | 0.015       | 0.017          |
| 40S ribosomal protein S15a-1                                                                                              | P42798            | <i>Arabidopsis thaliana</i>                | 0.129                               | 0.118       | 0.116       | 0.018          |
| 20 kDa chaperonin, chloroplastic                                                                                          | O65282            | <i>Arabidopsis thaliana</i>                | 0.011                               | 0.025       | 0.028       | 0.018          |
| NADPH--cytochrome P450 reductase 1                                                                                        | Q9SB48            | <i>Arabidopsis thaliana</i>                | 0.181                               | 0.006       | 0.072       | 0.019          |
| Eukaryotic translation initiation factor 2 subunit beta                                                                   | Q41969            | <i>Arabidopsis thaliana</i>                | 0.016                               | 0.015       | 0.144       | 0.019          |
| Histone H4 variant TH091                                                                                                  | P62786            | <i>Triticum aestivum</i>                   | 0.352                               | 0.061       | 0.033       | 0.023          |
| Histone H2A.2.2                                                                                                           | P02277            | <i>Triticum aestivum</i>                   | 0.139                               | 0.020       | 0.015       | 0.023          |
| Dynamitin-related protein 12A                                                                                             | Q39821            | <i>Glycine max</i>                         | 0.139                               | 0.015       | 0.020       | 0.023          |
| Probable fructokinase-7                                                                                                   | Q9FLH8            | <i>Arabidopsis thaliana</i>                | 0.027                               | 0.025       | 0.017       | 0.024          |

|                                                                                   |        |                                            |       |       |       |       |
|-----------------------------------------------------------------------------------|--------|--------------------------------------------|-------|-------|-------|-------|
|                                                                                   |        |                                            |       |       |       |       |
| Pyruvate dehydrogenase E1 component subunit beta-4. chloroplastic                 | Q10G39 | <i>Oryza sativa</i> subsp. <i>japonica</i> | 0.403 | 0.048 | 0.033 | 0.025 |
| Chaperonin CPN60. mitochondrial                                                   | P35480 | <i>Brassica napus</i>                      | 0.007 | 0.130 | 0.097 | 0.025 |
| 6-phosphogluconate dehydrogenase. decarboxylating 1                               | Q9LI00 | <i>Oryza sativa</i> subsp. <i>japonica</i> | 0.401 | 0.129 | 0.018 | 0.026 |
| 60S ribosomal protein L18-3                                                       | Q940B0 | <i>Arabidopsis thaliana</i>                | 0.380 | 0.049 | 0.069 | 0.028 |
| Chalcone synthase                                                                 | P30079 | <i>Pinus sylvestris</i>                    | 0.075 | 0.162 | 0.012 | 0.031 |
| Diacylglycerol O-acyltransferase 1                                                | Q9SLD2 | <i>Arabidopsis thaliana</i>                | 0.021 | 0.038 | 0.037 | 0.032 |
| Glutathione reductase. cytosolic                                                  | P48642 | <i>Oryza sativa</i> subsp. <i>japonica</i> | 0.071 | 0.043 | 0.455 | 0.032 |
| Pyruvate dehydrogenase E1 component subunit beta-1. mitochondrial                 | Q6Z1G7 | <i>Oryza sativa</i> subsp. <i>japonica</i> | 0.060 | 0.064 | 0.015 | 0.034 |
| Glutamyl-tRNA(Gln) amidotransferase subunit B. chloroplastic/mitochondrial        | Q2R2Z0 | <i>Oryza sativa</i> subsp. <i>japonica</i> | 0.160 | 0.021 | 0.032 | 0.036 |
| 25.3 kDa vesicle transport protein                                                | Q94AU2 | <i>Arabidopsis thaliana</i>                | 0.056 | 0.024 | 0.029 | 0.036 |
| Ubiquitin carboxyl-terminal hydrolase 13                                          | Q84WU2 | <i>Arabidopsis thaliana</i>                | 0.045 | 0.287 | 0.171 | 0.037 |
| Serine/threonine-protein phosphatase 2A 65 kDa regulatory subunit A gamma isoform | Q38951 | <i>Arabidopsis thaliana</i>                | 0.093 | 0.162 | 0.204 | 0.038 |
| 3-isopropylmalate dehydrogenase. chloroplastic                                    | P29696 | <i>Solanum tuberosum</i>                   | 0.385 | 0.061 | 0.049 | 0.038 |
| Alcohol dehydrogenase                                                             | P17648 | <i>Fragaria ananassa</i>                   | 0.321 | 0.097 | 0.056 | 0.041 |
| Carbamoyl-phosphate synthase large chain. chloroplastic                           | B9EXM2 | <i>Oryza sativa</i> subsp. <i>japonica</i> | 0.401 | 0.072 | 0.040 | 0.042 |
| Transcription factor TGA5                                                         | Q39163 | <i>Arabidopsis thaliana</i>                | 0.058 | 0.098 | 0.520 | 0.042 |
| 40S ribosomal protein S12                                                         | Q9XHS0 | <i>Hordeum vulgare</i>                     | 0.031 | 0.049 | 0.162 | 0.049 |

**Table S2.** One-way analysis of variance for expression of different transcripts detected in *P. halepensis* embryonal masses induced under different temperature conditions (23 °C, 9 weeks; 40 °C, 4 h; 50 °C, 30 min; 60 °C, 5 min).

| Kruskal-Wallis                                                                                                                  | df | X <sup>2</sup> test | p Value           |
|---------------------------------------------------------------------------------------------------------------------------------|----|---------------------|-------------------|
| 20 KDA CHAPERONIN (CPN20)                                                                                                       | 3  | 0.5245              | n.s. <sup>1</sup> |
| CHAPERONIN CPN60 (CPN60)                                                                                                        | 3  | 0.0745              | n.s.              |
| CITRATE SYNTHASE (PDHB)                                                                                                         | 3  | 0.2167              | n.s.              |
| PYRUVATE DEHYDROGENASE E1 COMPONENT SUBUNIT BETA- 1                                                                             | 3  | 0.1841              | n.s.              |
| 6-PHOSPHOGLUCONATE DEHYDROGENASE, DECARBOXYLATING 1 (G6PGH1)                                                                    | 3  | 0.2401              | n.s.              |
| PYRUVATE DEHYDROGENASE E1 COMPONENT SUBUNIT BETA-4                                                                              | 3  | 0.8395              | n.s.              |
| TRIFUNCTIONAL UDP-GLUCOSE 4,6-DEHYDRATASE/UDP-4-KETO-6DEOXY-D-GLUCOSE 3,5-EPIMERASE/UDP-4-KETO-L-RHAMNOSE-REDUCTASE RHM1 (RHM1) | 3  | 0.5921              | n.s.              |
| NADPH-CYTOCHROME P450 REDUCTASE 1 (ATR1)                                                                                        | 3  | 0.5959              | n.s.              |
| PROBABLE FRUCTOKINASE-7                                                                                                         | 3  | 0.6958              | n.s.              |

<sup>1</sup> not statistically significant.**Table S3.** One-way analysis of variance for concentration of sugars (μmol g<sup>-1</sup> FW) detected in *P. halepensis* embryonal masses induced under different temperature conditions (23 °C, 9 weeks; 40 °C, 4 h; 50 °C, 30 min; 60 °C, 5 min).

| Sugars   | df | F value | p value           |
|----------|----|---------|-------------------|
| Sucrose  | 3  | 3.7320  | 0.0330            |
| Glucose  | 3  | 1.1930  | n.s. <sup>1</sup> |
| Fructose | 3  | 1.8890  | n.s.              |
| Mannitol | 3  | 0.9782  | n.s.              |
| Sorbitol | 3  | 0.1167  | n.s.              |

<sup>1</sup> not statistically significant.

**Table S4.** One-way analysis of variance for concentration of amino acids ( $\mu\text{mol g}^{-1}$  FW) detected in *P. halepensis* embryonal masses induced under different temperature treatments (23 °C, 9 weeks; 40 °C, 4 h; 50 °C, 30 min; 60 °C, 5 min).

| Amino acids   |    |         |                   |
|---------------|----|---------|-------------------|
| ANOVA         | df | F value | p value           |
| Aspartic acid | 3  | 0.4546  | n.s. <sup>1</sup> |
| Glutamic acid | 3  | 0.5485  | n.s.              |
| Asparagine    | 3  | 1.6030  | n.s.              |
| Serine        | 3  | 0.8004  | n.s.              |
| Glutamine     | 3  | 4.4920  | 0.0181            |
| Histidine     | 3  | 0.5378  | n.s.              |
| Glycine       | 3  | 3.9470  | 0.0277            |
| Threonine     | 3  | 0.8126  | n.s.              |
| Arginine      | 3  | 0.3369  | n.s.              |
| Alanine       | 3  | 1.8050  | n.s.              |
| Tyrosine      | 3  | 0.5632  | n.s.              |
| Cysteine      | 3  | 4.2780  | 0.0213            |
| Valine        | 3  | 0.3568  | n.s.              |
| Metionine     | 3  | 0.5148  | n.s.              |
| Tryptophan    | 3  | 0.2859  | n.s.              |
| Phenilalanine | 3  | 0.0708  | n.s.              |
| Isoleucine    | 3  | 0.2505  | n.s.              |
| Leucine       | 3  | 0.3126  | n.s.              |
| Lysine        | 3  | 0.5958  | n.s.              |
| Proline       | 3  | 0.4094  | n.s.              |

<sup>1</sup> not statistically significant.
